# Supplementary material
Source: publisher figshare collection journal article supplement (https://acs.figshare.com/ndownloader/files/12282710)
Supplement: Supplementary file 1 [file 12282710]

# Effect of Rare-Earth Metal Oxide Nanoparticles on the Conductivity of Nanocrystalline Titanium Dioxide: An Electrical and Electrochemical Approach

Pom L. Kharel,<sup>1</sup> Paul M. Cuillier,<sup>2</sup> Kasun Fernando,<sup>3</sup> Francis P. Zamborini,<sup>1\*</sup> and Bruce W. Alphenaar<sup>3\*</sup>

<sup>1</sup>Department of Chemistry, University of Louisville, Louisville, Kentucky 40292, United States

<sup>2</sup>University of Arizona, Tucson, Arizona 85721, United States

<sup>3</sup>Electrical and Computer Engineering Department, University of Louisville, Louisville Kentucky 40292, United States

\*Corresponding Authors: [f.zamborini@louisville.edu](mailto:f.zamborini@louisville.edu) and [bruce.alphenaar@louisville.edu](mailto:bruce.alphenaar@louisville.edu)

## SUPPORTING INFORMATION

**Derivation of  $e^{-qV_{peak}/kT} = \nu/\nu_0$**

The following derivation is based on the work of Bisquert *et al.*<sup>1</sup> The change in the probability  $f$  that a trap state is occupied as a function of time is given by:

$$\frac{df(t)}{dt} = \frac{1}{\tau_{tr}(t)}[1 - f] - \frac{1}{\tau_{dtr}}f \quad (1)$$

where  $1/\tau_{tr}$  is the trapping rate and  $1/\tau_{dtr}$  is the de-trapping rate. For deep level traps, assuming that the rate of capture is proportional to the number of electrons in the conduction band, the de-trapping rate is assumed to be zero, while the trapping rate is given by:

$$\frac{1}{\tau_{tr}(t)} = \beta_n n_c = \frac{1}{\tau_0} e^{(E_{Fn}(t) - E_{FO})/kT} \quad (2)$$

where  $n_c$  is the density of electrons in the conduction band and  $\beta_n$  is the time constant per unit volume for electron capture.

The time dependence comes about because the Fermi energy changes as a function of time with potential:

$$-(E_{Fn}(t) - E_{F0})/q = V_0 - vt \quad (3)$$

Here,  $V_0$  is the starting bias, and  $v$  is the bias scan rate.

The trapping rate can then be re-written as:

$$\frac{1}{\tau_{tr}(t)} = (1/\tau_0) e^{-q(V_0 - vt)/kT} = g(t) \quad (4)$$

The function  $g(t)$  is introduced to make the mathematics easier to follow. Taking the derivative of Eq. (4) gives:

$$\frac{dg(t)}{dt} = \frac{qv}{kT} g(t) = \frac{1}{\tau_v} g(t)$$

where  $\tau_v = kT/qv$  is introduced. Solving the differential equation (1), the occupation probability  $f(t)$  should be given as:

$$f(t) = 1 - e^{(\tau_v g(0) - \tau_v g(t))} \quad (5)$$

Taking the derivative of Eq. (5),

$$\frac{df(t)}{dt} = \tau_v e^{(\tau_v g(0) - \tau_v g(t))} \frac{dg(t)}{dt} = g(t) e^{(\tau_v g(0) - \tau_v g(t))}$$

Re-writing Eq. (1) using our definition for  $g(t)$  and taking  $1/\tau_{dtr} = 0$  gives:

$$\frac{df(t)}{dt} = g(t)(1 - f(t)) \quad (6)$$

so clearly the function in (5) is a solution to the differential equation (6).

Finally, the peak position occurs at the potential where there is maximum change in the trap occupation probability, or at the point where  $d^2f/dt^2 = 0$ . Taking the second derivative of the occupation probability gives:

$$\frac{d^2f}{dt^2} = e^{\tau_v g(0)} \left[ -g^2(t) e^{-\tau_v g(t)} + \frac{g(t)}{\tau_v} e^{-\tau_v g(t)} \right]$$

For this to equal zero,  $g(t) = 1/\tau_v$ , or  $\tau_{tr} = kT/qv$ . Plugging this into Eq. (4) then gives:

$$\frac{qv}{kT} = 1/\tau_0 e^{-qV_{peak}/kT} \Rightarrow e^{-qV_{peak}/kT} = v/v_0$$

Adding rare earth oxide (REO) nanoparticles causes the peak position to have a stronger sweep rate dependence and appear at more negative potentials than in the pristine  $\text{TiO}_2$

material. This would occur if the probability for trapping an electron from the conduction band goes down because there are fewer low lying deep trap states.

### Conductivity of Pure REO nanoparticles

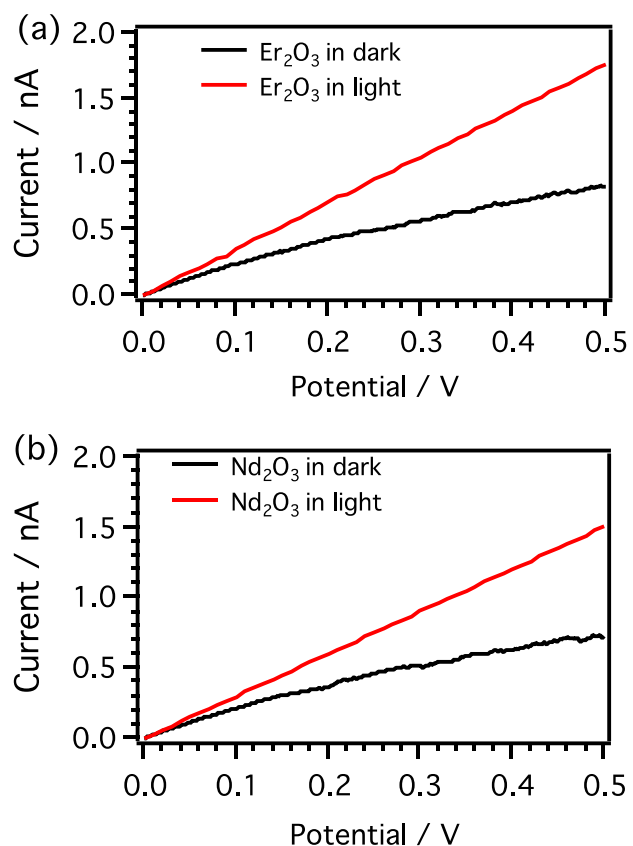

**Figure S1.** Conductivity measurements of films of pure (a)  $\text{Er}_2\text{O}_3$  and (b)  $\text{Nd}_2\text{O}_3$  nanoparticles. The films of rare earth oxide (REO) nanoparticles are less conductive than undoped titania.

**Cyclic voltammograms of undoped and REO-doped nanocrystalline titanium dioxide (NTD)**

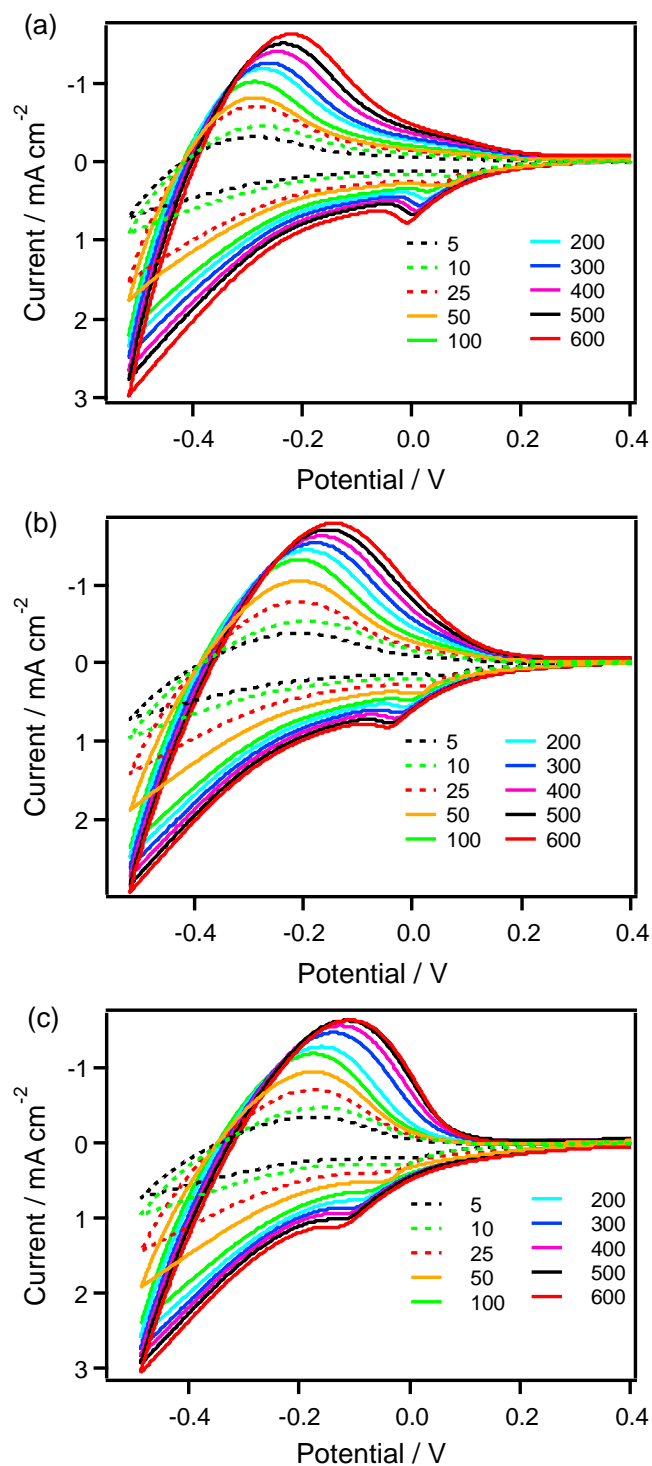

**Figure S2.** Cyclic voltammograms of (a) undoped, (b) ErNPs-Solid and (c) NdNPs-Solid at different scan rates as shown in the keys. The scan rates are in mV/s.

**Table S1.** Peak potentials at different scan rates for the different films.

| Scan Rates<br>(mV/s) | Peak potential (V) vs RHE |             |             |
|----------------------|---------------------------|-------------|-------------|
|                      | Undoped                   | ErNPs-Solid | NdNPs-Solid |
| 5                    | 0.123                     | 0.073       | 0.018       |
| 10                   | 0.109                     | 0.058       | 0.003       |
| 25                   | 0.078                     | 0.033       | -0.025      |
| 50                   | 0.065                     | 0.019       | -0.038      |
| 100                  | 0.042                     | -0.001      | -0.065      |
| 200                  | 0.040                     | -0.018      | -0.075      |
| 300                  | 0.024                     | -0.028      | -0.093      |
| 400                  | 0.012                     | -0.032      | -0.099      |
| 500                  | 0.005                     | -0.038      | -0.104      |
| 600                  | 0.001                     | -0.048      | -0.126      |

**Table S2.** Calculation of  $\tau_0$  from Figure 4b.

| Samples     | $y - intercept = \frac{kT}{q} \ln(v_0)$ | $v_0$ (mV/s) | $\tau_0$ (ms) |
|-------------|-----------------------------------------|--------------|---------------|
| Undoped     | 0.16756                                 | 629.3        | 42            |
| ErNPs-Solid | 0.11946                                 | 98.95        | 263           |
| NdNPs-Solid | 0.057258                                | 9.045        | 2874          |

1. Bertoluzzi, L.; Cardona, I. H.; Gottesman, R.; Zaban, A.; Bisquert, J. Relaxation of Electron Carriers in the Density of States of Nanocrystalline TiO<sub>2</sub>. *J. Phys. Chem. Lett.* **2014**, 5, 689-694.
